# Supplementary material for: An Updated Overview on the Regulation of Seed Germination
Source: Plants (Basel). 2020 Jun 1;9(6):703. doi: 10.3390/plants9060703 (PMC7356954; doi:10.3390/plants9060703)
Supplement: Supplementary file 1 [file plants-09-00703-s001.pdf]

# An Updated Overview on the Regulation of Seed Germination

**Table S1.** Selected recent reviews on seed germination-related aspects.

| Subject (Keywords)                                                                                                                            | References |
|-----------------------------------------------------------------------------------------------------------------------------------------------|------------|
| <b>Generalists</b>                                                                                                                            |            |
| ABA, Arabidopsis, dormancy, germination, GA, seed maturation.                                                                                 | [3]        |
| <b>GAs and ABA</b>                                                                                                                            |            |
| GAs, ABA, hormone signaling, seed germination, abiotic stresses, crosstalk of hormone signaling.                                              | [10]       |
| DELLAs, GAs, hormone crosstalk, phenotypic plasticity, plant development.                                                                     | [20]       |
| DELLA, GRAS, GAs, Arabidopsis, rice, GID1, crosstalk,                                                                                         | [22]       |
| ABA, ABA synthesis, ABA signaling, ABA response.                                                                                              | [35]       |
| PYR1, RCAR, ABA transduction, SnRK2, PP2C.                                                                                                    | [42]       |
| ABI5, abiotic stress response, phytohormone crosstalk, ABA, brassinosteroids, GAs, jasmonates, posttranslational modification.                | [81]       |
| <b>Hormones transport</b>                                                                                                                     |            |
| GA biosynthesis, GA action, GA transport, evolution, <i>Gibberella fujikuroi</i> .                                                            | [48]       |
| GA, plant hormone, hormone transport and localization, GA transporters, NPF, SWEET.                                                           | [49]       |
| ABA; guard cell; transporter; water stress.                                                                                                   | [50]       |
| GA metabolism, GA transport, GA gradients, cellular growth.                                                                                   | [51]       |
| Plant NRT1/PTR transporters, phylogenetic relationships, substrates.                                                                          | [72]       |
| Glucosinolate, hormone, nitrate, nitrite, peptide, transporter.                                                                               | [73]       |
| NIN-like protein (NLP), nitrate, nitrate-responsive gene expression, post-translational regulation, transcription factor, nitrate signalling. | [77]       |
| <b>Light regulation</b>                                                                                                                       |            |
| PIF signaling, Phytochromes, plant development.                                                                                               | [109]      |
| <b>Chromatin dynamics</b>                                                                                                                     |            |
| Shoot apical meristem, quiescent center, floral homeotic gene, polycomb repression, seed development, dormancy, germination and greening.     | [162]      |
| DNA methylation, genomic imprinting, Polycomb group proteins, plants.                                                                         | [309]      |
| <b>Small RNAs</b>                                                                                                                             |            |
| Seed germination, seed, small RNA, miRNA, stress response, seed dormancy.                                                                     | [189]      |
| microRNA, siRNA, Arabidopsis.                                                                                                                 | [202]      |
| <b>Postranslational modifications</b>                                                                                                         |            |
| ABA, ABA signaling, post-translational regulation, phosphorylation, dephosphorylation, ubiquitination, 26S proteasome system.                 | [232]      |
| <b>Dormancy</b>                                                                                                                               |            |
| Environmental cueing, extinction, germination, physiological dormancy, speciation.                                                            | [2]        |
| Seed dormancy, germination, ABA, GAs, phytohormone crosstalk.                                                                                 | [239]      |
| ABA, dormancy, germination, GAs, plant hormones, preharvest sprouting, seed, cereals.                                                         | [240]      |
| Cereal grain, cereals, pre-harvest sprouting, seed dormancy, seed germination.                                                                | [241]      |
| Crop seed dormancy, germination, phytohormones, pre-harvest sprouting.                                                                        | [242]      |
| Dormancy, germination, endosperm weakening, DOG1, ABA signaling.                                                                              | [260]      |

|                                                                                                                                                                                    |       |
|------------------------------------------------------------------------------------------------------------------------------------------------------------------------------------|-------|
| Environment, FLC, flowering time, maternal, seed coat, seed development, seed dormancy, seed germination, tannin, temperature.                                                     | [308] |
| Pre-dispersal, post-dispersal, predation, seed ageing, seed decay, seed defence, seed dispersal, seed dormancy, seed longevity, seed persistence.                                  | [355] |
| Annual life cycle, Arabidopsis, DOG1, dormancy cycling, germination, nitrate signalling, PHYA, seed dormancy.                                                                      | [356] |
| <b>Other hormones and ROS</b>                                                                                                                                                      |       |
| NO, ABA, dormancy, germination, seed, vigor.                                                                                                                                       | [138] |
| NO, dormancy, germination, hypocotyl elongation, reactive nitrogen species, root development, seeds.                                                                               | [139] |
| Carbon monoxide (CO), abiotic stress, growth and development, antioxidant defense, physiological role, signaling transduction.                                                     | [177] |
| Ethylene, ABA; dormancy; GAs; ROS; seed germination.                                                                                                                               | [285] |
| Karrikins, germination, smoke, signaling, strigolactone.                                                                                                                           | [292] |
| ROS, Abiotic stress response, molecular regulators, phytohormones, PCD, seed germination.                                                                                          | [315] |
| ROS, seed physiology, germination, seed dormancy, signalling, embryogenesis, PCD.                                                                                                  | [337] |
| ROS, dormancy, germination, hydrogen peroxide, phytohormone, priming, seed, signaling molecule.                                                                                    | [338] |
| ROS, aging seeds, antioxidant system, DNA damage, methylation.                                                                                                                     | [341] |
| <b>AR and longevity</b>                                                                                                                                                            |       |
| Glassy state, seed, longevity, viscosity, desiccation tolerance, non-reducing sugars, LEA proteins, stability, dry state, molecular mobility, molecular density, hydrogen-bonding. | [312] |
| Desiccation tolerance, ABA, chlorophyll, longevity, LEA proteins, raffinose family oligosaccharides.                                                                               | [313] |
| AR, dormancy, hormones, seed storage, oxidative reactions, seed bank, early imbibition.                                                                                            | [316] |
| AR, ABA, Arabidopsis, dormancy, endosperm, germination, seed.                                                                                                                      | [317] |
| Seed germination, dormancy, longevity, seed development, RNA-binding proteins, $\alpha$ -amanitin, proteome, translatoe.                                                           | [324] |
| Desiccation tolerance, proteome, seed developments seed germination, seed vigor.                                                                                                   | [336] |
| DNA repair, seeds, germination, priming, aging.                                                                                                                                    | [344] |
| Anhydrobiosis, desiccation, dormancy, hormone, longevity, oxidation.                                                                                                               | [348] |
| <b>Biomechanics</b>                                                                                                                                                                |       |
| Endosperm, embryo, germination, seed, ABA, GAs.                                                                                                                                    | [362] |
| Angiosperms, apoplastic ROS, biological materials, seed coat, seed development, embryo growth potential, endosperm weakening, germination, puncture force, seed biomechanics.      | [364] |

**Table S2.** List of complete gene names in alphabetical order according to their acronyms.

| Abbreviation/<br>Gene Name | Complete Name                                                 | Gene Type                                        |
|----------------------------|---------------------------------------------------------------|--------------------------------------------------|
| <i>ABA2</i>                | <i>ABSCISIC ACID DEFICIENT 2</i>                              | Absciscic acid biosynthetic enzyme               |
| <i>ABCG</i>                | <i>ATP BINDING CASSETTE (ABC) G</i>                           | G subfamily of ABC transporter                   |
| <i>ABF/AREB</i>            | <i>ABSCISIC ACID-RESPONSIVE ELEMENT (ABRE)-BINDING FACTOR</i> | Basic leucine zipper (bZIP) TF                   |
| <i>ABI3</i>                | <i>ABSCISIC ACID INSENSITIVE 3</i>                            | B3 domain-containing TF                          |
| <i>ABI4</i>                | <i>ABSCISIC ACID INSENSITIVE 4</i>                            | APETALA2/Ethylene Responsive Factor (AP2/ERF) TF |

|                    |                                                                 |                                                                                                                                                            |
|--------------------|-----------------------------------------------------------------|------------------------------------------------------------------------------------------------------------------------------------------------------------|
| <i>ABI5</i>        | <i>ABSCISIC ACID<br/>INSENSITIVE 5</i>                          | Basic leucine zipper (bZIP) TF                                                                                                                             |
| <i>ACO</i>         | <i>1-AMINOCYCLOPROPANE-1-<br/>CARBOXYLIC ACID (ACC) OXIDASE</i> | Ethylene biosynthetic enzyme                                                                                                                               |
| <i>AGL</i>         | <i>AGAMOUS-LIKE</i>                                             | MCM1/Agamous/Deficiens/SRF (MADS)-<br>box TF                                                                                                               |
| <i>AHG1</i>        | <i>ABA HYPERSENSITIVE<br/>GERMINATION 1</i>                     | Protein phosphatase 2C (PP2C)                                                                                                                              |
| <i>AHG3</i>        | <i>ABA HYPERSENSITIVE<br/>GERMINATION 3</i>                     | Protein phosphatase 2C (PP2C)                                                                                                                              |
| <i>AHT1</i>        | <i>ABA-HYPERSENSITIVE BTB/POZ<br/>PROTEIN1</i>                  | Broad-complex, Tramtrack, and Bric-à-<br>brac/poxvirus and zinc finger (BTB/POZ)-<br>domain-containing protein                                             |
| <i>AL</i>          | <i>ALFIN1-LIKE PROTEIN</i>                                      | Plant homeodomain (PHD) finger protein                                                                                                                     |
| <i>ALE1</i>        | <i>ABNORMAL LEAF-SHAPE 1</i>                                    | PA domain-containing subtilase                                                                                                                             |
| <i>ALN</i>         | <i>ALLANTOINASE</i>                                             | Allantoin degradation and assimilation<br>enzyme                                                                                                           |
| <i>AOS</i>         | <i>ALLENE OXIDE SYNTHASE</i>                                    | JA biosynthetic enzyme                                                                                                                                     |
| <i>ARF</i>         | <i>AUXIN RESPONSE FACTOR</i>                                    | ARF TF                                                                                                                                                     |
| <i>ARR</i>         | <i>ARABIDOPSIS RESPONSE REGULATOR</i>                           | ARR TF                                                                                                                                                     |
| <i>ATHB</i>        | <i>ARABIDOPSIS THALIANA HOMEODOMAIN</i>                         | Homeodomain-Leucine zipper (HD-Zip)<br>TF                                                                                                                  |
| <i>ATM</i>         | <i>ATAXIA TELANGIECTASIA MUTATED</i>                            | Phosphatidylinositol 3 kinase-like (PI3K)<br>protein kinase                                                                                                |
| <i>ATML1</i>       | <i>ARABIDOPSIS THALIANA<br/>MERISTEM LAYER 1</i>                | Homeodomain-Leucine zipper (HD-Zip)<br>TF                                                                                                                  |
| <i>ATR</i>         | <i>ATM AND RAD3-RELATED</i>                                     | Phosphatidylinositol 3 kinase-like (PI3K)<br>protein kinase                                                                                                |
| <i>ATS2</i>        | <i>ACYLTRANSFERASE 2</i>                                        | Lysophosphatidic acid acyltransferase                                                                                                                      |
| <i>ATXR7</i>       | <i>ARABIDOPSIS TRITHORAX-RELATED 7</i>                          | Histone-lysine N-methyltransferase                                                                                                                         |
| <i>AUX1</i>        | <i>AUXIN TRANSPORTER PROTEIN 1</i>                              | Auxin influx carrier protein                                                                                                                               |
| <i>BBX21</i>       | <i>B-BOX (BBX) CONTAINING<br/>ZINC-FINGER 21</i>                | B-box zinc finger TF                                                                                                                                       |
| <i>BDG1</i>        | <i>BODYGUARD1</i>                                               | Cutin biosynthetic hydrolase                                                                                                                               |
| <i>BES1</i>        | <i>BR INSENSITIVE 1 (BRI1)-EMS-<br/>SUPPRESSOR 1</i>            | Basic helix-loop-helix (bHLH) TF                                                                                                                           |
| <i>BIN2</i>        | <i>BRASSINOSTEROID INSENSITIVE2</i>                             | Glycogen Synthase Kinase 3-like kinase                                                                                                                     |
| <i>BRM</i>         | <i>BRAHMA</i>                                                   | SWITCH2/Sucrose non-fermentable2<br>(SWI2/SNF2) chromatin-remodeling<br>ATPase                                                                             |
| <i>BZR1</i>        | <i>BRASSINAZOLE RESISTANT 1</i>                                 | Basic helix-loop-helix (bHLH) TF                                                                                                                           |
| <i>CDF4/DOF2.3</i> | <i>CYCLIC DOF FACTOR 4/DNA-BINDING<br/>WITH ONE FINGER 2.3</i>  | DNA-binding with one finger (DOF) TF                                                                                                                       |
| <i>CHD3</i>        | <i>CHROMODOMAIN HELICASE-DNA<br/>BINDING 3</i>                  | ATP-dependent Chromodomain<br>Helicase-DNA binding3 (CHD3) type<br>chromatin-remodeling factor of the<br>SWITCH/Sucrose nonfermentable<br>(SWI/SNF) family |
| <i>CHO1</i>        | <i>CHOTTO1</i>                                                  | Double APETALA2 (AP2) repeat TF                                                                                                                            |
| <i>CHR</i>         | <i>CHROMATIN-REMODELING</i>                                     | SWITCH2/Sucrose non-fermentable2<br>(SWI2/SNF2) ATPase                                                                                                     |
| <i>COG1/DOF1.5</i> | <i>COGWHEEL1/DNA-BINDING WITH<br/>ONE FINGER 1.5</i>            | DNA-binding with one finger (DOF) TF                                                                                                                       |
| <i>COP1</i>        | <i>CONSTITUTIVE<br/>PHOTOMORPHOGENIC 1</i>                      | E3 ubiquitin ligase                                                                                                                                        |
| <i>COP10</i>       | <i>CONSTITUTIVE<br/>PHOTOMORPHOGENIC 10</i>                     | Ubiquitin-conjugating enzyme variant<br>(UEV)                                                                                                              |

|                        |                                                                    |                                                                                                     |
|------------------------|--------------------------------------------------------------------|-----------------------------------------------------------------------------------------------------|
| <i>CRA1/CRU1</i>       | <i>CRUCIFERINA</i>                                                 | 12S seed storage protein                                                                            |
| <i>CRL3</i>            | <i>CULLIN-RING E3 LIGASE3</i>                                      | E3 ubiquitin ligase                                                                                 |
| <i>CRU3</i>            | <i>CRUCIFERIN3</i>                                                 | 12S seed storage protein                                                                            |
| <i>CTG10</i>           | <i>COLD TEMPERATURE GERMINATING 10</i>                             | KELCH F-Box protein                                                                                 |
| <i>CTS</i>             | <i>COMATOSE</i>                                                    | Peroxisomal ATP-binding cassette transporter                                                        |
| <i>CUL4</i>            | <i>CULLIN 4</i>                                                    | E3 ubiquitin ligase component                                                                       |
| <i>CYP</i>             | <i>CYTOCHROME P450</i>                                             | Enzymes (CYP707As are monooxygenases, ABA catabolic enzymes)                                        |
| <i>D14</i>             | <i>DWARF14</i>                                                     | Strigolactone receptor                                                                              |
| <i>DAG1</i>            | <i>DOF-AFFECTING GERMINATION 1</i>                                 | DNA-binding with one finger (DOF) TF                                                                |
| <i>DCP5</i>            | <i>DECAPPING 5</i>                                                 | Decapping complex component                                                                         |
| <i>DDB1</i>            | <i>DET1-DAMAGED DNA BINDING PROTEIN 1</i>                          | COP10, DDB1, DET1 (CDD) complex component (regulates the activity of ubiquitin conjugating enzymes) |
| <i>DET1</i>            | <i>DE-ETIOLATED 1</i>                                              | COP10, DDB1, DET1 (CDD) complex component (regulates the activity of ubiquitin conjugating enzymes) |
| <i>DOG1</i>            | <i>DELAY OF GERMINATION 1</i>                                      | DELAY OF GERMINATION (DOG)-family protein                                                           |
| <i>EBS</i>             | <i>EARLY BOLTING IN SHORT DAY</i>                                  | Bromo-adjacent homology (BAH)-plant homeodomain (PHD)-containing protein                            |
| <i>EFS</i>             | <i>EARLY FLOWERING IN SHORT DAYS</i>                               | Histone-lysine N-methyltransferase                                                                  |
| <i>EMF2</i>            | <i>EMBRYONIC FLOWER 2</i>                                          | Polycomb group (PcG) protein                                                                        |
| <i>ERF</i>             | <i>ETHYLENE RESPONSE FACTORS</i>                                   | APETALA2/Ethylene Responsive Factor (AP2/ERF) TFs                                                   |
| <i>ETR1/RDO3</i>       | <i>ETHYLENE RESPONSE 1/ REDUCED DORMANCY 3</i>                     | Ethylene receptor                                                                                   |
| <i>EXP8</i>            | <i>EXPANSIN-A8</i>                                                 | Alpha-Expansin protein                                                                              |
| <i>EXPA</i>            | <i>EXPANSIN</i>                                                    | Alpha-Expansin proteins                                                                             |
| <i>FLC</i>             | <i>FLOWERING LOCUS C</i>                                           | MCM1/Agamous/Deficiens/SRF MADS-box protein                                                         |
| <i>FT</i>              | <i>FLOWERING LOCUS T</i>                                           | Phosphatidylethanolamine-binding protein                                                            |
| <i>FUS3</i>            | <i>FUSCA3</i>                                                      | B3 domain-containing TF                                                                             |
| <i>F<sub>y</sub>PP</i> | <i>PHYTOCHROME-ASSOCIATED SERINE/THREONINE PROTEIN PHOSPHATASE</i> | Type 6 serine/threonine protein phosphatase (PP6) phosphatase                                       |
| <i>GA20ox</i>          | <i>GA 20-OXIDASES</i>                                              | GA biosynthetic enzyme                                                                              |
| <i>GA2ox</i>           | <i>GA 2-OXIDASES</i>                                               | GA catabolic enzyme                                                                                 |
| <i>GA3ox</i>           | <i>GA 3-OXIDASES</i>                                               | GA biosynthetic enzyme                                                                              |
| <i>GAI</i>             | <i>GIBBERELIC ACID INSENSITIVE</i>                                 | DELLA protein                                                                                       |
| <i>GARU</i>            | <i>GA RECEPTOR RING E3 UBIQUITIN LIGASE</i>                        | E3 ubiquitin ligase                                                                                 |
| <i>GASA6</i>           | <i>GIBBERELIC ACID-STIMULATED ARABIDOPSIS 6</i>                    | GASA peptide                                                                                        |
| <i>GATA12</i>          | <i>GATA TRANSCRIPTION FACTOR 12</i>                                | GATA-type zinc finger TF                                                                            |
| <i>GID1</i>            | <i>GIBBERELLIN INSENSITIVE DWARF 1</i>                             | GA receptor                                                                                         |
| <i>GID2</i>            | <i>GIBBERELLIN INSENSITIVE DWARF 2</i>                             | F-box factor                                                                                        |
| <i>GSO</i>             | <i>GASSHO</i>                                                      | Leucine-rich repeat transmembrane-type receptor kinase                                              |
| <i>HD2B</i>            | <i>HISTONE DEACETYLASE2B</i>                                       | Histone deacetylase                                                                                 |
| <i>HDA</i>             | <i>HISTONE DEACETYLASE</i>                                         | Histone deacetylase                                                                                 |
| <i>HDAC</i>            | <i>HISTONE DEACETYLASE</i>                                         | Histone deacetylase                                                                                 |
| <i>HFR1</i>            | <i>LONG HYPOCOTYL IN FAR-RED 1</i>                                 | Basic helix-loop-helix (bHLH) TF                                                                    |

|                           |                                                                                                                                        |                                                                                            |
|---------------------------|----------------------------------------------------------------------------------------------------------------------------------------|--------------------------------------------------------------------------------------------|
| <i>HSI2</i>               | <i>HIGH-LEVEL EXPRESSION OF SUGAR-INDUCIBLE GENE 2</i>                                                                                 | B3 domain-containing TF                                                                    |
| <i>HUB1/RDO4</i>          | <i>HISTONE MONOUBIQUITINATION 1/REDUCED DORMANCY 4</i>                                                                                 | E3 ubiquitin ligase                                                                        |
| <i>HUB2</i>               | <i>HISTONE MONO-UBIQUITINATION 2</i>                                                                                                   | E3 ubiquitin ligase                                                                        |
| <i>HY1</i>                | <i>HEME OXYGENASE 1</i>                                                                                                                | Phytochrome chromophore biosynthetic enzyme                                                |
| <i>HY5</i>                | <i>LONG HYPOCOTYL 5</i>                                                                                                                | Basic leucine zipper (bZIP) TF                                                             |
| <i>HYH/bZIP64</i>         | <i>HY5-LIKE</i>                                                                                                                        | Basic leucine zipper (bZIP) TF                                                             |
| <i>ICE1</i>               | <i>INDUCER OF CBF EXPRESSION 1</i>                                                                                                     | Basic helix-loop-helix (bHLH) TF                                                           |
| <i>JAR1</i>               | <i>JASMONATE RESISTANT 1</i>                                                                                                           | Jasmonoyl-L-amino acid synthetase                                                          |
| <i>JAZ1</i>               | <i>JASMONATE-ZIM-DOMAIN PROTEIN 1</i>                                                                                                  | JA signaling repressor                                                                     |
| <i>JMJ</i>                | <i>JUMONJI</i>                                                                                                                         | Histone demethylase                                                                        |
| <i>KAI2/HTL</i>           | <i>KARRIKIN INSENSITIVE2 (KAI2)/HYPOSENSITIVE TO LIGHT (HTL)</i>                                                                       | $\alpha/\beta$ -fold hydrolase; karrikin receptor                                          |
| <i>KEG</i>                | <i>KEEP ON GOING</i>                                                                                                                   | E3 ligase                                                                                  |
| <i>KRS</i>                | <i>KERBEROS</i>                                                                                                                        | Endosperm-specific cysteine-rich peptide                                                   |
| <i>LACS2</i>              | <i>LONG-CHAIN ACYL-COA SYNTHETASE 2</i>                                                                                                | Fatty acid metabolic enzyme                                                                |
| <i>LDL</i>                | <i>LYSINESPECIFIC DEMETHYLASE-LIKE</i>                                                                                                 | Histone demethylase                                                                        |
| <i>LEC1</i>               | <i>LEAFY COTYLEDON 1</i>                                                                                                               | Subunit of the nuclear transcription factor Y (NF-Y) CCAAT-binding TF                      |
| <i>LEC2</i>               | <i>LEAFY COTYLEDON 2</i>                                                                                                               | B3 domain-containing TF                                                                    |
| <i>LSM1</i>               | <i>SM-LIKE 1</i>                                                                                                                       | Component of the decapping machinery                                                       |
| <i>LUH</i>                | <i>LEUNIG_HOMOLOG</i>                                                                                                                  | Groucho family co-repressor                                                                |
| <i>MAP3K</i>              | <i>MITOGEN-ACTIVATED PROTEIN KINASE KINASE KINASE</i>                                                                                  | Mitogen-activated protein kinase                                                           |
| <i>MAX2</i>               | <i>MORE AXILLARY GROWTH 2</i>                                                                                                          | F-box protein                                                                              |
| <i>MFT</i>                | <i>MOTHER-OF-FT</i>                                                                                                                    | Phosphatidylethanolamine-binding protein                                                   |
| <i>MPK/MAPK</i>           | <i>MITOGEN-ACTIVATED PROTEIN KINASE</i>                                                                                                | Mitogen-activated protein (MAP) kinase                                                     |
| <i>MYB</i>                | <i>MYELOBLASTOSIS</i>                                                                                                                  | MYB TF                                                                                     |
| <i>NAC</i>                | <i>NAM, ATAF1/2, AND CUC2</i>                                                                                                          | NAC TF                                                                                     |
| <i>NCED</i>               | <i>9-CIS-EPOXYCAROTENOID DIOXYGENASES</i>                                                                                              | ABA biosynthetic enzymes                                                                   |
| <i>NF-YC</i>              | <i>NUCLEAR FACTOR-Y C</i>                                                                                                              | CCAAT-binding TF                                                                           |
| <i>NIA/NR</i>             | <i>NITRATE REDUCTASE</i>                                                                                                               | Enzyme; asimilation of nitrate into ammonia                                                |
| <i>NIR1</i>               | <i>NITRITE REDUCTASE</i>                                                                                                               | Enzyme; asimilation of nitrate into ammonia                                                |
| <i>NLP</i>                | <i>NIN-LIKE PROTEIN</i>                                                                                                                | Nitrate response NLP family TF                                                             |
| <i>NPF</i>                | <i>NITRATE TRANSPORTER1 (NRT1)/PEPTIDE TRANSPORTER (PTR)</i>                                                                           | Hormone, peptide and nitrate transporter family                                            |
| <i>NPF4.6/AIT1/NRT1.2</i> | <i>NITRATE TRANSPORTER1 (NRT1)/PEPTIDE TRANSPORTER (PTR) (NPF) 4.6/ABA-IMPORTING TRANSPORTER (AIT) 1/NITRATE TRANSPORTER (NRT) 1.2</i> | ABA and nitrate NPF transporter                                                            |
| <i>NRE</i>                | <i>NITRATE RESPONSE CIS-ELEMENT</i>                                                                                                    | NLP binding sequence                                                                       |
| <i>NRPD1</i>              | <i>NUCLEAR RNA POLYMERASE D1</i>                                                                                                       | RNA polymerase that mediates 24-nt short-interfering RNAs (siRNA) accumulation             |
| <i>PAF1C</i>              | <i>RNA POLYMERASE II-ASSOCIATED FACTOR 1 COMPLEX</i>                                                                                   | Pol II-associated platform that recruits factors required for Pol II progression (mammals) |
| <i>PDF2</i>               | <i>PROTODERMAL FACTOR 2</i>                                                                                                            | Homeodomain (HD-ZIP) TF                                                                    |

|                       |                                                                                                  |                                                                                                                                                |
|-----------------------|--------------------------------------------------------------------------------------------------|------------------------------------------------------------------------------------------------------------------------------------------------|
| <i>PER1</i>           | <i>1-CYSTEINE PEROXIREDOXIN 1</i>                                                                | Peroxiredoxin family of antioxidants                                                                                                           |
| <i>PIF1/PIL5</i>      | <i>PHYTOCHROME INTERACTING FACTOR 1/PHYTOCHROME-INTERACTING FACTOR 3-LIKE 5</i>                  | Basic helix-loop-helix (bHLH) TF                                                                                                               |
| <i>PIF6/PIL2</i>      | <i>PHYTOCHROME-INTERACTING FACTOR 6/PHYTOCHROME INTERACTING FACTOR 3-LIKE 2</i>                  | Basic helix-loop-helix (bHLH) TF                                                                                                               |
| <i>PIF8/UNE10</i>     | <i>PHYTOCHROME-INTERACTING FACTOR 8/UNFERTILIZED EMBRYO SAC 10</i>                               | Basic helix-loop-helix (bHLH) TF                                                                                                               |
| <i>PKL</i>            | <i>PICKLE</i>                                                                                    | ATP-dependent Chromodomain Helicase-DNA binding3 (CHD3) type chromatin-remodeling factor of the SWITCH/sucrose nonfermentable (SWI/SNF) family |
| <i>PP1</i>            | <i>TYPE 1 SERINE/THREONINE PROTEIN PHOSPHATASE</i>                                               | PPP (phosphoprotein phosphatase) family phosphatase                                                                                            |
| <i>PP2A</i>           | <i>TYPE 2A SERINE/THREONINE PROTEIN PHOSPHATASE</i>                                              | PPP (phosphoprotein phosphatase) family phosphatase                                                                                            |
| <i>PP2C</i>           | <i>TYPE 2C SERINE/THREONINE PROTEIN PHOSPHATASE</i>                                              | PPP (phosphoprotein phosphatase) family phosphatase                                                                                            |
| <i>PP6</i>            | <i>TYPE 6 SERINE/THREONINE PROTEIN PHOSPHATASE</i>                                               | PPP (phosphoprotein phosphatase) family phosphatase                                                                                            |
| <i>PRC1</i>           | <i>POLYCOMB REPRESSOR COMPLEX 1</i>                                                              | Complex that catalyzes H2AK119ub                                                                                                               |
| <i>PRC2</i>           | <i>POLYCOMB REPRESSOR COMPLEX 2</i>                                                              | Complex that catalyzes H3K27me3                                                                                                                |
| <i>PWR</i>            | <i>POWERDRESS</i>                                                                                | SANT (Swi3, Ada2, N-Cor, TFIIB) domain-containing protein                                                                                      |
| <i>PYR/PYL/RCAR</i>   | <i>PYRABACTIN RESISTANCE 1-PYRABACTIN RESISTANCE 1-LIKE/REGULATORY COMPONENT OF ABA RECEPTOR</i> | ABA receptor                                                                                                                                   |
| <i>RAF</i>            | <i>RAPIDLY ACCELERATED FIBROSARCOMA (RAF)-LIKE KINASE</i>                                        | Mitogen-activated protein kinase kinase kinase (MAP3K)                                                                                         |
| <i>RAV1</i>           | <i>RELATED TO ABI3/VP1 1</i>                                                                     | APETALA2/Ethylene Responsive Factor (AP2/ERF) and B3 domain-containing TF                                                                      |
| <i>RDO5/DOG18/IBO</i> | <i>REDUCED DORMANCY 5/DELAY OF GERMINATION 18/IBRAHIM BEKIROVIĆ</i>                              | Type 2C serine/threonine protein phosphatase                                                                                                   |
| <i>RGA</i>            | <i>REPRESSOR OF GA1-3</i>                                                                        | DELLA protein                                                                                                                                  |
| <i>RGL2</i>           | <i>RGA-LIKE2</i>                                                                                 | DELLA protein                                                                                                                                  |
| <i>RRP41L/SLG</i>     | <i>RIBOSOMAL RNA-PROCESSING PROTEIN 41-LIKE/SLOWER GROWTH</i>                                    | RNase phosphorolytic (PH) domain-type protein; putative core subunit of the exosome                                                            |
| <i>RSL1</i>           | <i>RING FINGER OF SEED LONGEVITY1</i>                                                            | E3 ubiquitin ligase                                                                                                                            |
| <i>RSM1</i>           | <i>RADIALIS-LIKE SANT/MYB 1</i>                                                                  | Myeloblastosis (MYB) TF                                                                                                                        |
| <i>RVE</i>            | <i>REVEILLE</i>                                                                                  | Myeloblastosis (MYB)-like TF                                                                                                                   |
| <i>SAG</i>            | <i>SENSITIVE TO ABA DURING GERMINATION</i>                                                       | Midasin homologue 1 (MDN1) domain-containing protein                                                                                           |
| <i>SCF</i>            | <i>SKP1-CULLIN1-F-BOX</i>                                                                        | Subclass of E3 ubiquitin ligase                                                                                                                |
| <i>SCL</i>            | <i>SCARECROW-LIKE</i>                                                                            | GRAS TF                                                                                                                                        |
| <i>SDG8</i>           | <i>SET DOMAIN GROUP 8</i>                                                                        | Histone methyltransferase                                                                                                                      |
| <i>SDR4L</i>          | <i>SEED DORMANCY 4-LIKE</i>                                                                      | Sdr4 family protein                                                                                                                            |
| <i>SEC</i>            | <i>SECRET AGENT</i>                                                                              | O-linked N-acetylglucosamine transferase                                                                                                       |
| <i>SIZ1</i>           | <i>SAP AND MIZ-FINGER DOMAIN-CONTAINING PROTEIN 1</i>                                            | SUMO E3 ligase                                                                                                                                 |
| <i>SLY1</i>           | <i>SLEEPY1</i>                                                                                   | F-box protein                                                                                                                                  |

|                       |                                                                             |                                                                                             |
|-----------------------|-----------------------------------------------------------------------------|---------------------------------------------------------------------------------------------|
| <i>SMAX1</i>          | <i>SUPPRESSOR OF MAX2-1</i>                                                 | Heat-shock-related protein; karrikin signaling                                              |
| <i>SMR5</i>           | <i>SIAMESE-RELATED 5</i>                                                    | Cell cycle inhibitor                                                                        |
| <i>SNE/SLY2</i>       | <i>SNEEZY/SLEEPY2</i>                                                       | F-box protein                                                                               |
| <i>SNL</i>            | <i>SWITCH (SWI)-INDEPENDENT 3 (SIN3)-LIKE</i>                               | Histone deacetylase-binding factor                                                          |
| <i>SnRK2</i>          | <i>SUCROSE NONFERMENTING-1 (SNF1)-RELATED PROTEIN KINASE</i>                | Sucrose nonfermenting-1/ AMP-activated Protein Kinases (SNF1/AMPK) serine/threonine kinases |
| <i>SOM</i>            | <i>SOMNUS</i>                                                               | C3H-type zinc finger TF                                                                     |
| <i>SPA1</i>           | <i>SUPPRESSOR OF PHYA-105 1</i>                                             | Component of the COP1/SPA E3 ubiquitin-protein ligase                                       |
| <i>SPT</i>            | <i>SPATULA</i>                                                              | Basic helix-loop-helix (bHLH) TF                                                            |
| <i>SPY</i>            | <i>SPINDLY</i>                                                              | O-fucosyltransferase                                                                        |
| <i>SUVH5/SET9</i>     | <i>SUPPRESSOR OF VARIATION 3-9 HOMOLOG PROTEIN 5/SET DOMAIN GROUP 9</i>     | Histone-lysine N-methyltransferase                                                          |
| <i>SWEET</i>          | <i>SUGARS WILL EVENTUALLY BE EXPORTED TRANSPORTERS</i>                      | Sugar and GA transporter                                                                    |
| <i>SWI2/SNF2</i>      | <i>SWITCH2/SUCROSE NON-FERMENTABLE 2</i>                                    | ATP-dependent chromatin-remodeling family                                                   |
| <i>TAGK2/CRK2</i>     | <i>CALCIUM-DEPENDENT PROTEIN KINASE (CDPK/CPK)-RELATED PROTEIN KINASE 2</i> | Tyrosine kinase                                                                             |
| <i>TAP46</i>          | <i>2A PHOSPHATASE-ASSOCIATED PROTEIN OF 46 KDA</i>                          | Protein phosphatase2A (PP2A)-associated protein                                             |
| <i>TFIIS/RDO2</i>     | <i>TRANSCRIPTION ELONGATION FACTOR TFIIS/REDUCED DORMANCY 2</i>             | Transcription elongation factor                                                             |
| $\alpha$ - <i>TIP</i> | <i>ALPHA-TONOPLAST INTRINSIC PROTEIN</i>                                    | Aquaporin water channel                                                                     |
| <i>TOPP4</i>          | <i>TYPE ONE PROTEIN PHOSPHATASE 4</i>                                       | Serine/threonine protein phosphatase                                                        |
| <i>TPL</i>            | <i>TOPELESS</i>                                                             | Groucho family co-repressor                                                                 |
| <i>TT10/LAC15</i>     | <i>TRANSPARENT TESTA 10/LACCASE-15</i>                                      | Laccase-like enzyme                                                                         |
| <i>TWS1</i>           | <i>TWISTED SEED 1</i>                                                       | Small protein                                                                               |
| <i>VCS</i>            | <i>VARICOSE</i>                                                             | Decapping complex component                                                                 |
| $\delta$ - <i>VPE</i> | <i>DELTA VACUOLAR PROCESSING ENZYME</i>                                     | Caspase-1-like vacuolar processing enzyme                                                   |
| <i>VQ</i>             | <i>FXXXVQXXTG (VQ) MOTIF-CONTAINING PROTEIN</i>                             | VQ family protein                                                                           |
| <i>WRKY</i>           | <i>WRKY DNA-BINDING PROTEIN</i>                                             | WRKY TF                                                                                     |
| <i>XRN4/AIN1/EIN5</i> | <i>EXORIBONUCLEASE 4/ACC INSENSITIVE 1/ETHYLENE INSENSITIVE 5</i>           | 5'-3' exoribonuclease                                                                       |
| <i>XTH31</i>          | <i>XYLOGLUCAN ENDOTRANSGLYCOSYLASES/HYDROLASES 31</i>                       | Xyloglucan endohydrolase and xyloglucan endotransglucosylase                                |
| <i>XYL1/TRG1</i>      | <i>ALPHA-XYLOSIDASE 1/THERMOINHIBITION RESISTANT GERMINATION 1</i>          | alpha-l-arabinofuranosidase/beta-d-xylosidase                                               |
| <i>ZOU/RGE1</i>       | <i>ZHOUP1/RETARDED GROWTH OF EMBRYO 1</i>                                   | Basic helix-loop-helix (bHLH) TF                                                            |
| <i>ZRF</i>            | <i>ZUOTIN-RELATED FACTOR</i>                                                | H2Aub1 deubiquitination                                                                     |
